# Supplementary material for: Reduction/oxidation-phosphorylation control of DNA binding in the bZIP dimerization network
Source: Springer Nature journal article supplement (doi:10.1186/1471-2164-7-107), 2006-05-04
Supplement: 12864_2006_490_MOESM3_ESM.pdf [file 12864_2006_490_MOESM3_ESM.pdf]

|                   |                              |
|-------------------|------------------------------|
| CEBP-gamma_Cebp-g | NSDEYRQRRERNMAVKK SRLKSKQK   |
| CEBP_Cebp-b       | HSDEYKIRRRERNNI AVRKSRDKAKMR |
| PAR_Dbp           | KDEKYWSRRYKNN EAAKR SRDARRLK |
| E4BP4_E4bp4       | KDAMYWEKRRKNN EAAKR SREKRRLN |
| BATF_B-Atf        | DDVRRVQRREKNRI AAQKSRQRQTOK  |
| OASIS_Oasis       | KALKRVRRKIKNKI SAQESRRKKKEY  |
| OASIS-B_CrebH     | RVLKKIRRKIRNKQ SAQESRKKKKEY  |
| ATF6_At6          | AVLRRQORMIKNRES ACQSRKKKKEY  |
| ATF4_At4          | KLDKKLKKMEQNKTA ATRYRQKKRAE  |
| ATF2_At2          | PDEKRRKFLERNRAA ASRCRQKRKVW  |
| FOS_cFos          | EEEKRRIRRRERNK MAAAKCRNRRREL |
| ATF3_At3          | EDERKKRRRERNKI AAACRNKKKKEK  |
| NFE2_Nfe2-p45     | ALVRDIIRRRGKNK VAAQNCRKRKLET |
| BACH_Bach1        | DCIHDIRRRSKNR IAAQRCRKRKLDK  |
| JUN_cJun          | ERIKAERKMRNR IAAASKCRKRKLER  |
| S-MAF_MafG        | VQLKQRRRTLKNRG YAASCRVKRVTQ  |
| L-MAF_cMaf        | IRLKQKRRTLKNRG YAQSCRFKRVQQ  |
| CREB_At1          | PQLKREIRLMKNRE AAARECRRKKKEY |
| XBP1_Xbp1         | PEEKALRRKLN RVAAQTARDRKKAR   |
| ruler             | 1.....10.....20.....         |
