# Supplementary material for: Reduction/oxidation-phosphorylation control of DNA binding in the bZIP dimerization network
Source: Springer Nature journal article supplement (doi:10.1186/1471-2164-7-107), 2006-05-04

C type monomer      S or Y type monomer

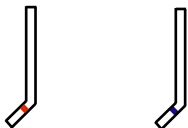

C-C type dimer

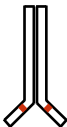

C-S, C-Y type dimer

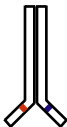

S-S, S-Y, YY type dimer

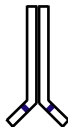

Oxidative Stress

Weakly blocks  
DNA binding

Phosphorylation

Totally blocks  
DNA binding

Oxidative Stress

Strongly blocks  
DNA binding

Phosphorylation

Totally blocks  
DNA binding

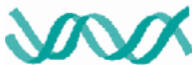

Supplement: 12864_2006_490_MOESM4_ESM.pdf [file 12864_2006_490_MOESM4_ESM.pdf]
