# Supplementary material for: Reduction/oxidation-phosphorylation control of DNA binding in the bZIP dimerization network
Source: Springer Nature journal article supplement (doi:10.1186/1471-2164-7-107), 2006-05-04

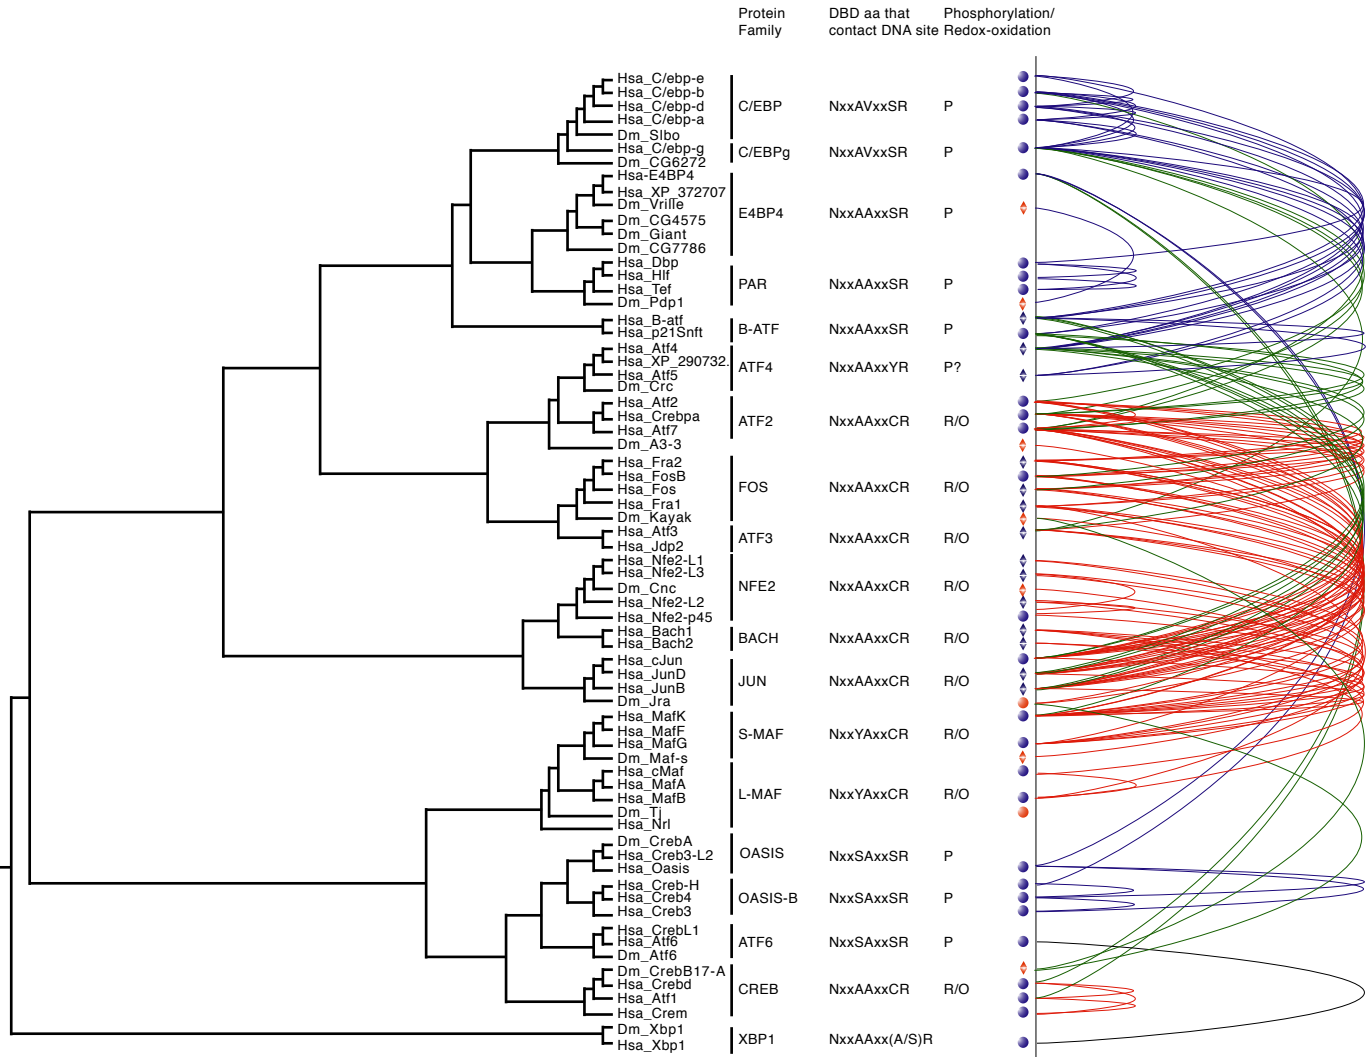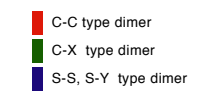

Supplement: 12864_2006_490_MOESM6_ESM.pdf [file 12864_2006_490_MOESM6_ESM.pdf]
